# Supplementary material for: Chemotherapeutic copolymers prepared via the RAFT polymerization of prodrug monomers
Source: Royal Society of Chemistry journal article supplement (doi:10.1039/c6py00756b), 2016-01-01
Supplement: c6py00756b1.pdf [file c6py00756b1.pdf]

## Supplementary Information

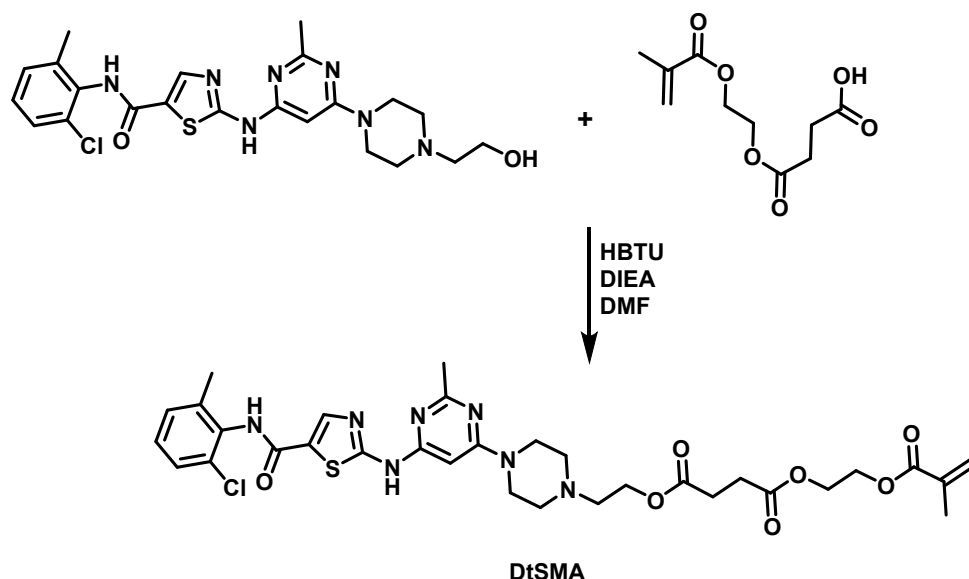

Synthesis of *N*-(2-Chloro-6-methylphenyl)-2-[[6-[4-(2-methacryloxyethylsuccinylethyl)-1-piperazinyl]-2-methyl-4-pyrimidinyl]amino)-1,3-thiazole-5-carboxamide (**Dt-SMA**). To a mixture of 2-(methacryloyloxyethyl) monosuccinate (SMA) 920 mg (4 mmol) and *N,N,N',N'*-tetramethyl-*O*-(1*H*-benzotriazol-1-yl)uronium hexafluorophosphate (HBTU) 1.9 g (5 mmol) in 25 mL anhydrous DMF was added *N,N*-diisopropylethylamine 1.4 mL (8 mmol) at 0 °C. After 10 min. at 0 °C, the solution was stirred at room temperature for 20 min. *N*-(2-Chloro-6-methylphenyl)-2-[[6-[4-(2-hydroxyethyl)-1-piperazinyl]-2-methyl-4-pyrimidinyl]amino)-1,3-thiazole-5-carboxamide 976 mg (2 mmol) was then introduced as solid, and stirring was continued at room temperature for 6 h. The reaction mixture was poured into ice cold water and stirred for 20 min. The off-white solid obtained was filtered, washed with water and dried under high vacuum. The crude ester was dissolved in 15 mL of 15 % methanol in chloroform and purified by column chromatography using 10 % methanol in chloroform containing 0.3 %  $\text{NH}_4\text{OH}$ . Yield = 990 mg (70.7 %).  $^1\text{H}$  NMR (300 MHz,  $\text{DMSO-d}_6$ , ppm)  $\delta$  11.46 (s, 1H, **H14**), 9.87 (s, 1H, **H16**), 8.20 (s, 1H, **H13**), 7.38 (d,  $J = 6.2$  Hz, 1H, **H20**), 7.31-7.18 (m, 2H, **H18 & H19**), 6.08-5.97 (m, 2H, **H2 & H15**), 5.58 (s, 1H, **H1**), 4.27 (s, 4H, **H4 & H5**), 4.13 (t,  $J = 5.7$  Hz, 2H, **H8**), 3.49 (s, 4H, **H11**), 2.63-2.52 (m, 6H, **H9 & H10**), 2.48 (m, 4H, **H6 & H7** merged with DMSO peak), 2.39 (s, 3H, **H12**), 2.22 (s, 3H, **H17**), 1.85 (s, 3H, **H3**);  $^{13}\text{C}$  NMR (125 MHz,

DMSO- $d_6$ , ppm)  $\delta$  172.3, 166.9, 165.6, 163.1, 162.8, 160.4, 157.4, 141.3, 139.3, 136.1, 134.0, 132.9, 129.5, 128.6, 127.5, 126.6, 126.2, 83.1, 62.9, 62.5, 62.0, 56.4, 52.8, 44.0, 29.08, 29.05, 26.0, 18.8, 18.4; ESI-MS ( $C_{32}H_{38}ClN_7O_7S$ ):  $m/z = 701.0$   $[M+1]^+$  and 722.5  $[M+Na]^+$ .

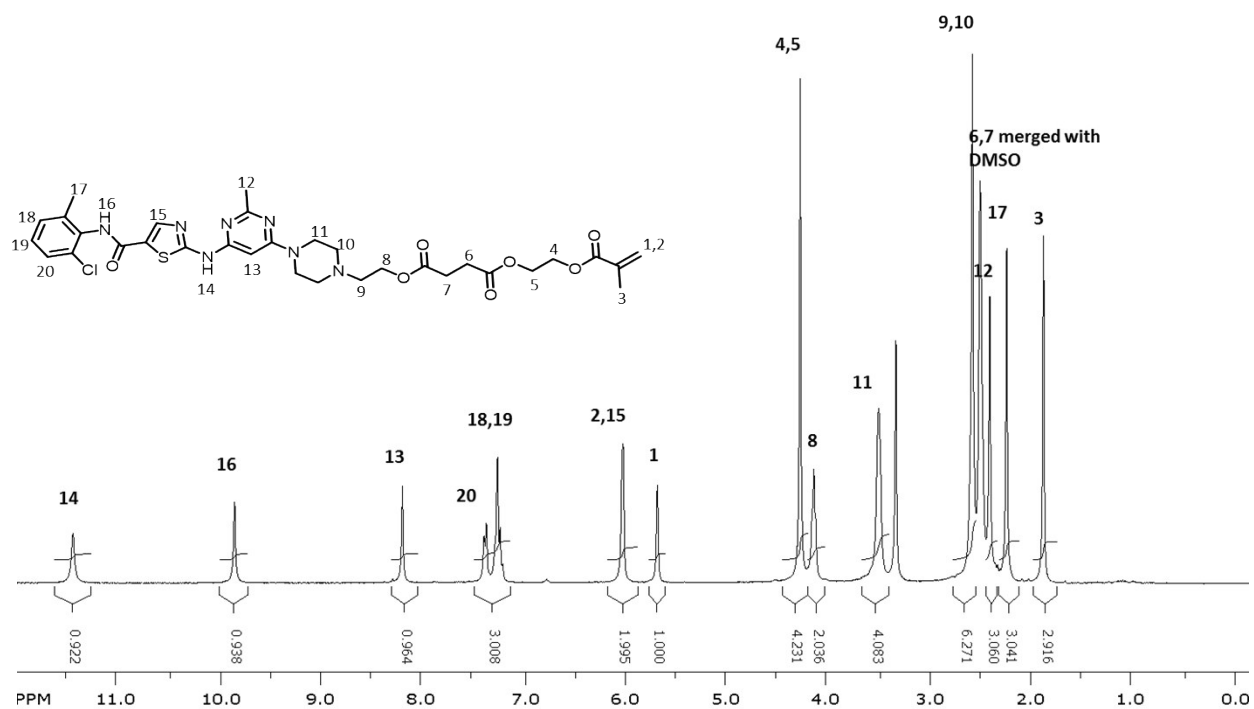

Supporting Information Fig 1.  $^1H$  NMR of Dt-SMA with peak assignments in D6 DMSO

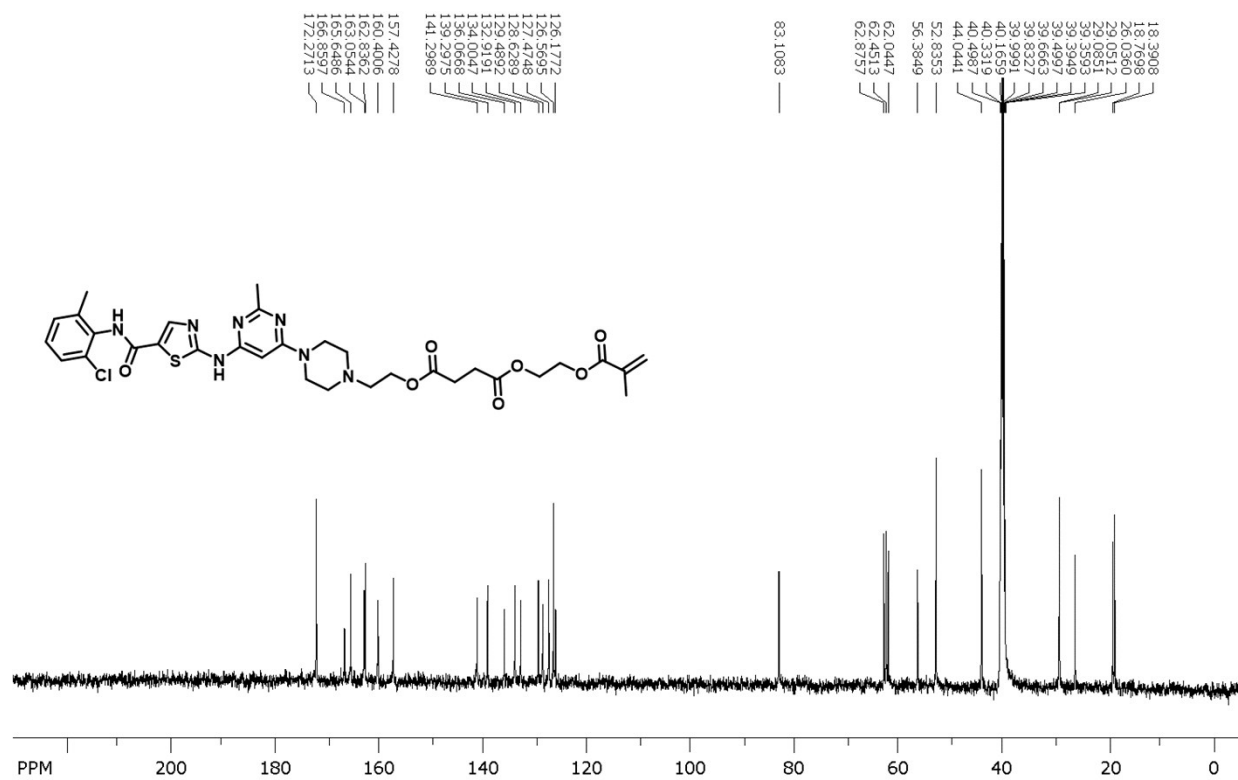

Supporting Information Fig 2. <sup>13</sup>C-NMR spectrum of Dt-SMA in DMSO-d<sub>6</sub>

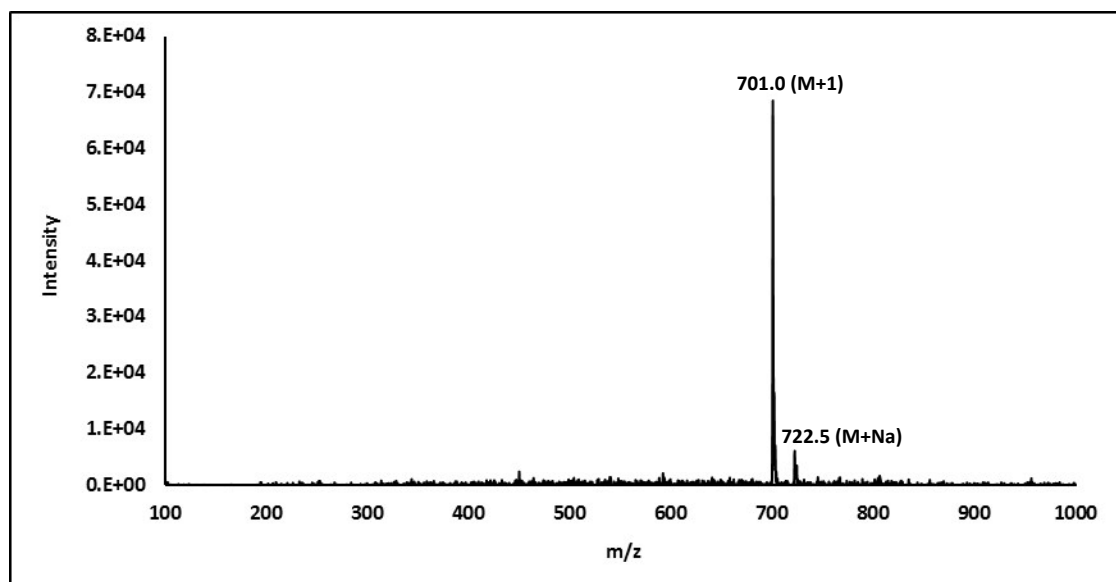

Supporting Information Fig 3. Electrospray ionization mass spectrum of Dt-SMA

### Synthetic procedure: Cam-SMA

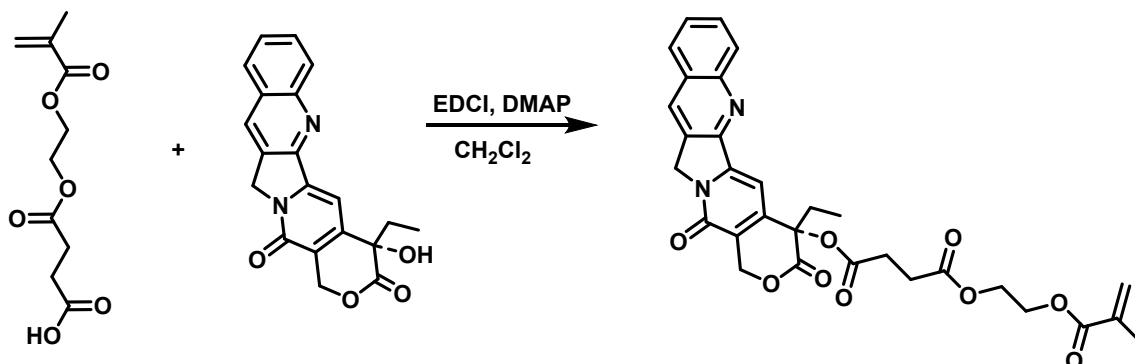

To a solution of mono-2-(methacryloyloxy)ethyl succinate (SMA) 460 mg (2 mmol), *N*-(3-dimethylaminopropyl)-*N'*-ethylcarbodiimide hydrochloride (EDCI.HCl) 767 mg (4 mmol) and *N,N*-dimethylpyridin-4-amine (DMAP) 122 mg (1 mmol) in 60 mL CH<sub>2</sub>Cl<sub>2</sub> was added camptothecin 348 mg (1 mmol) as solid. After stirring at RT for 6 h, the reaction mixture was washed with water (2 X 30mL) and the organic phase was dried over anhydrous sodium sulfate. After evaporation of the solvent under reduced pressure, the resulting crude product was purified by silica gel column chromatography using 7 % methanol in chloroform. Yield = 544 mg (97.0 %). <sup>1</sup>H NMR (300 MHz, CDCl<sub>3</sub>, ppm): δ 8.39 (s, 1H, **H13**), 8.23 (d, *J* = 8.4 Hz, 1H, **H17**), 7.94 (d, *J* = 8.1 Hz, 1H, **H14**), 7.83 (t, *J* = 7.6 Hz, 1H, **H15**), 7.67 (t, *J* = 7.5 Hz, 1H, **H16**), 7.29 (s, 1H, **H11**), 6.06 (s, 1H, **H1**), 5.67 (d, *J* = 17.2 Hz, 1H, **H10**), 5.55 (s, 1H, **H2**), 5.39 (d, *J* = 17.2 Hz, 1H, **H10**), 5.28 (s, 1H, **H12**), 4.20 – 4.40 (m, 4H, **H4 & H5**), 2.85 (m, 2H, **H7**), 2.70 (m, 2H, **H6**), 2.06-2.39 (m, 2H, **H8**), 1.89 (s, 3H, **H3**), 0.99 (t, *J* = 7.4 Hz, 3H, **H9**); <sup>13</sup>C NMR (125 MHz, DMSO-*d*<sub>6</sub>, ppm) δ 171.5, 171.2, 167.3, 167.0, 157.3, 152.3, 148.8, 146.2, 145.9, 135.8, 131.2, 130.7, 129.5, 128.5, 128.2, 128.1, 128.0, 126.0, 120, 96.2, 76.3, 67.0, 62.5, 62.2, 49.9, 31.8, 28.9, 28.7, 18.2, 7.60. ESI-MS (C<sub>30</sub>H<sub>28</sub>N<sub>2</sub>O<sub>9</sub>): *m/z* = 561.9 [M + 1]<sup>+</sup>, 583.5 [M + Na]<sup>+</sup> and 599.3 [M + K]<sup>+</sup>.

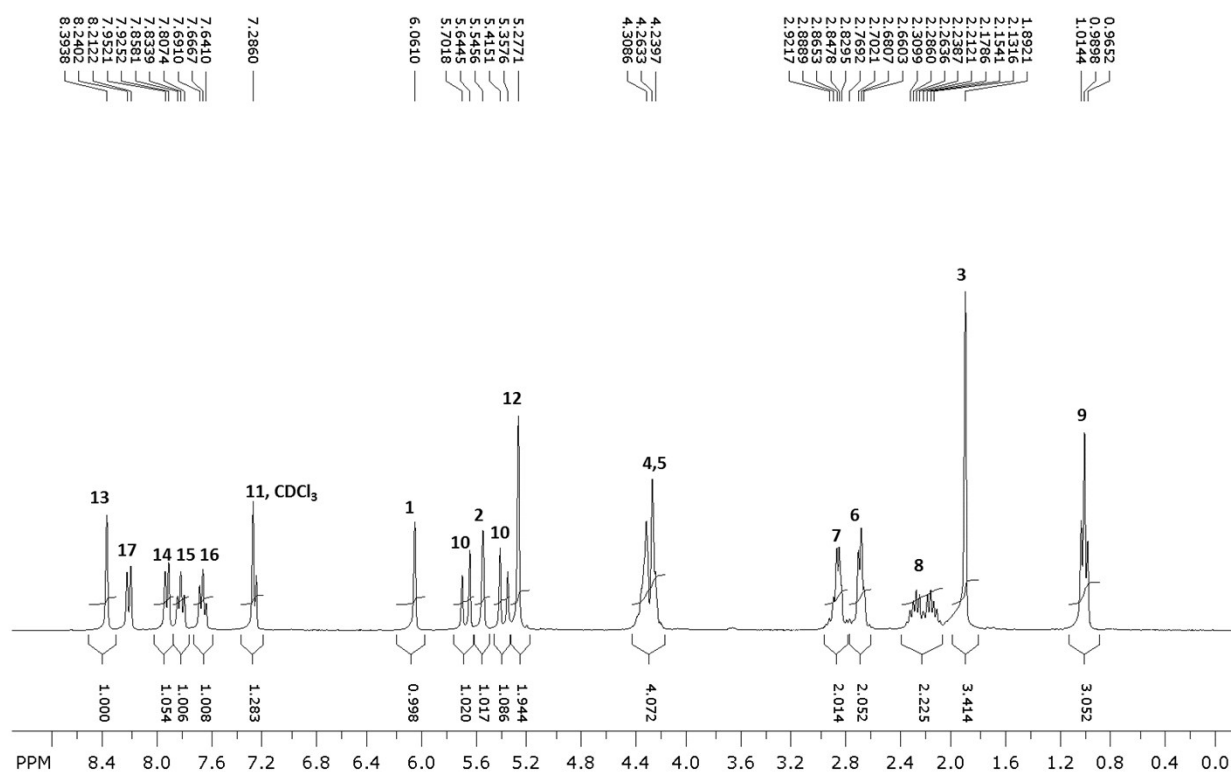

Supporting Information Fig 4. <sup>1</sup>H-NMR spectrum of Cam-SMA in CDCl<sub>3</sub>

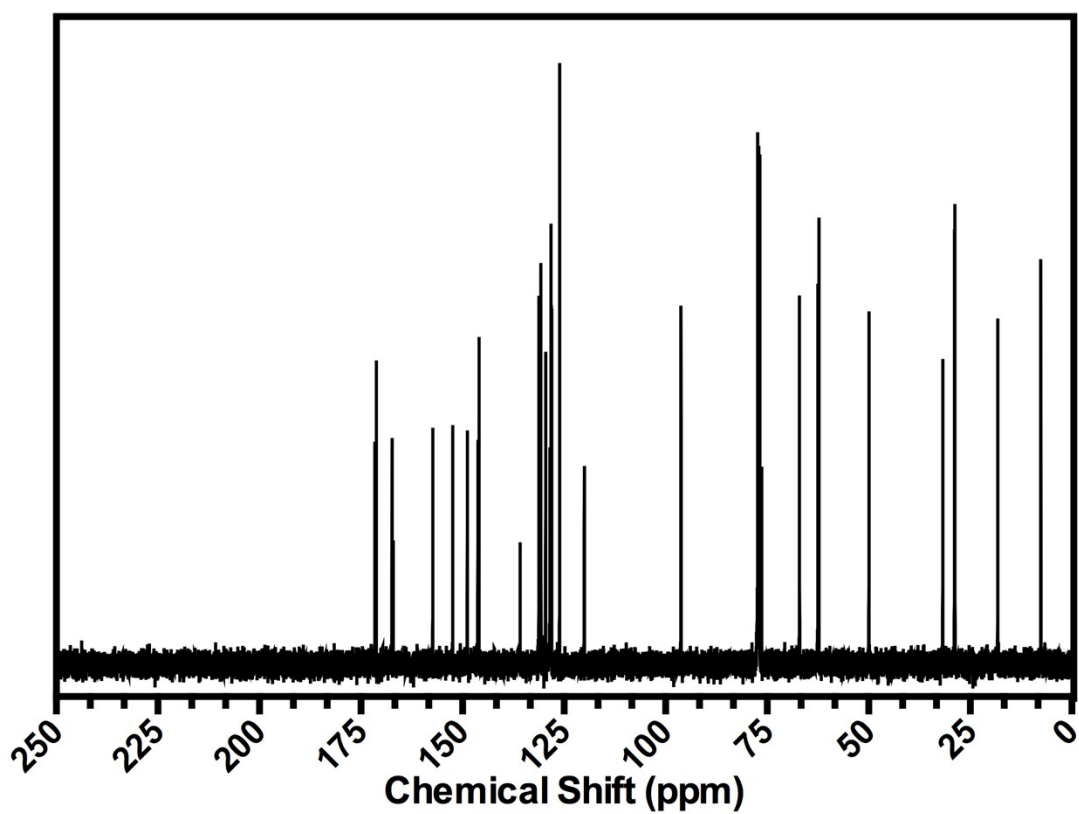

Supporting Information Fig 5.  $^{13}\text{C}$  NMR spectrum of Cam-SMA in  $\text{CDCl}_3$

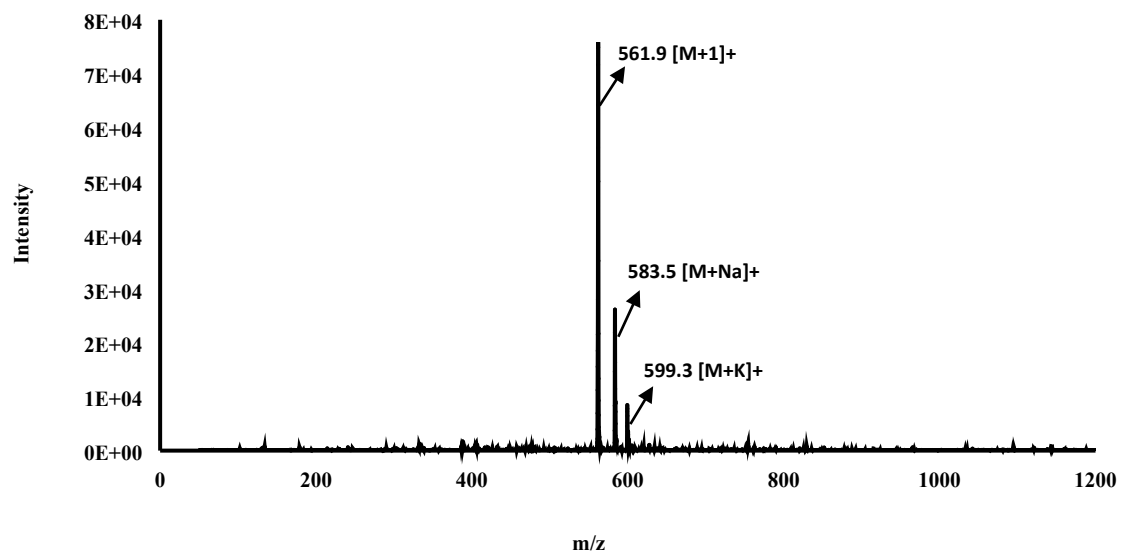

Supporting Information Fig 6. Electrospray ionization mass spectrum of Cam-SMA

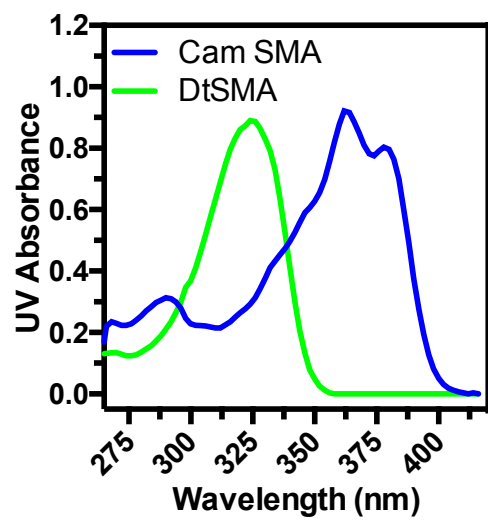

Supporting Information Fig 7. UV-VS absorbance spectrums for Cam-SMA and Dt-SMA in DMF

**Table 1.** Molecular weight, composition, and molar mass dispersity ( $\bar{D}$ ) values for the RAFT copolymerization of DMAEMA and tBMA and subsequent block copolymerization of Dasa SMA.

| <b>Mn Block 1<sup>a</sup></b><br><b>(MAA/DMAEMA)</b> | <b><math>\bar{D}^a</math></b><br><b>Block</b><br><b>1</b> | <b>% MAA<sup>b</sup></b><br><b>Block 1</b><br><b>(MA/DMAEMA)</b> | <b>% DMAEMA<sup>b</sup></b><br><b>Block 1</b><br><b>(MA/DMAEMA)</b> | <b>DP block 1<sup>a,b</sup></b><br><b>(MA/DMAEMA)</b> | <b>M<sub>n</sub><sup>b</sup></b><br><b>Block 2</b><br><b>(DASA</b><br><b>SMA)</b> | <b><math>\bar{D}^a</math></b><br><b>Block 2</b><br><b>(DASA</b><br><b>SMA)</b> | <b>DP<sup>b</sup></b><br><b>Block 2</b><br><b>(DASA</b><br><b>SMA)</b> |
|------------------------------------------------------|-----------------------------------------------------------|------------------------------------------------------------------|---------------------------------------------------------------------|-------------------------------------------------------|-----------------------------------------------------------------------------------|--------------------------------------------------------------------------------|------------------------------------------------------------------------|
| 5100                                                 | 1.06                                                      | 51                                                               | 49                                                                  | 40                                                    | 13800                                                                             | 1.19                                                                           | 12                                                                     |

a As determined by a combination size exclusion chromatography (Tosoh SEC TSK-GEL  $\alpha$ -3000 and  $\alpha$ -4000 columns Tosoh Bioscience, Montgomeryville, PA) connected in series to an Agilent 1200 Series Liquid Chromatography System (Santa Clara, CA) and Wyatt Technology miniDAWN TREOS, 3 angle MALS light scattering instrument and Optilab TrEX, refractive index detector (Santa Barbara, CA) and  $^1\text{H}$  NMR. HPLC-grade DMF containing 0.1 wt.% LiBr at 60 °C was used as the mobile phase at a flow rate of 1 mL/min.

b As determined by  $^1\text{H}$  NMR in DMSO  $\text{D}_6$  by comparison of the  $\text{N}(\text{CH}_3)_2$  resonances at 2.85 ppm to the Dasa SMA aromatic resonance at 8.25 ppm.
